# Supplementary material for: Silver-deposited titanium as a prophylactic ‘nano coat’ for peri-implantitis
Source: Royal Society of Chemistry journal article supplement (doi:10.1039/d3na00898c), 2024-01-01
Supplement: d3na00898c1.pdf [file d3na00898c1.pdf]

Supplementary Information for

**Silver-deposited titanium as a prophylactic ‘nano coat’ for peri-implantitis**

**Vaibhav Madiwal<sup>a,b</sup> and Jyutika Rajwade<sup>a,b\*</sup>**

<sup>a</sup>*Nanobioscience Group, Agharkar Research Institute, G. G. Agarkar Road, Pune 411 004, India*

<sup>b</sup>*Savitribai Phule Pune University, Homi Bhabha Road, Pune 411 007, India*

**Table S1.** Sequences of primers used in the qPCR

| Gene          | Forward seq.                 | Reverse seq.                 |
|---------------|------------------------------|------------------------------|
| <i>GAPDH</i>  | 5' TTTTGCCTCGCCAGCCGAG 3'    | 5' CCAGAGTTAAAAGCAGCCCTGG 3' |
| <i>ALP</i>    | 5' CCCCTGAGCGTCCTGTTCT 3'    | 5' GCGGCAGACTTTGGTTTC 3'     |
| <i>Col1a</i>  | 5' AGGGCCAAGACGAAGACATC 3'   | 5' AGATCACGTCATCGCACAACA 3'  |
| <i>BMP-2</i>  | 5' GGCCCTCATCAAGGGTTGGA 3'   | 5'AGGGTGGGCAGAAAACACGA 3'    |
| <i>RUNX-2</i> | 5' CATCACTGTCCTTTGGGAGTAG 3' | 5' CTTGGCCCTCCATTGTAAGA 3'   |

**Table S2.** Elemental analysis of Ti and Ag-deposited Ti surfaces using EDS

| Samples            | Elements (Weight %) |      |      |     |             |
|--------------------|---------------------|------|------|-----|-------------|
|                    | C K                 | Al K | Ti K | V K | Ag L        |
| Ti                 | 4.5                 | 5.7  | 85.6 | 4.0 | -           |
| Ti-Ag <sub>1</sub> | 5.5                 | 5.5  | 85.0 | 3.7 | <b>0.23</b> |
| Ti-Ag <sub>2</sub> | 4.8                 | 5.4  | 85.5 | 3.2 | <b>0.99</b> |
| Ti-Ag <sub>5</sub> | 5.8                 | 5.3  | 83.7 | 3.1 | <b>1.62</b> |

**Table S3.** Average elastic modulus and hardness of Ti-Ag<sub>5</sub> sample determined by nanoindentation

| <b>Indentation #</b> | <b>Avg. Modulus (Gpa)</b> | <b>Avg. Hardness (Gpa)</b> |
|----------------------|---------------------------|----------------------------|
| <b>1</b>             | 389.5                     | 29.59                      |
| <b>2</b>             | 416.0                     | 35.03                      |
| <b>3</b>             | 453.0                     | 34.89                      |
| <b>4</b>             | 382.1                     | 29.90                      |
| <b>5</b>             | 358.3                     | 28.67                      |
| <b>6</b>             | 369.0                     | 27.70                      |
| <b>Avg.</b>          | <b>394.7</b>              | <b>30.96</b>               |
| <b>SD</b>            | <b>34.7</b>               | <b>3.19</b>                |
